# Supplementary material for: CNTNAP4 deficiency in dopaminergic neurons initiates parkinsonian phenotypes
Source: PubMed Central journal article supplement (PMC7053186; doi:10.7150/thno.40798), 2020-02-10
Supplement: thnov10p3000s1.pdf [file thnov10p3000s1.pdf]

## Supplementary Materials

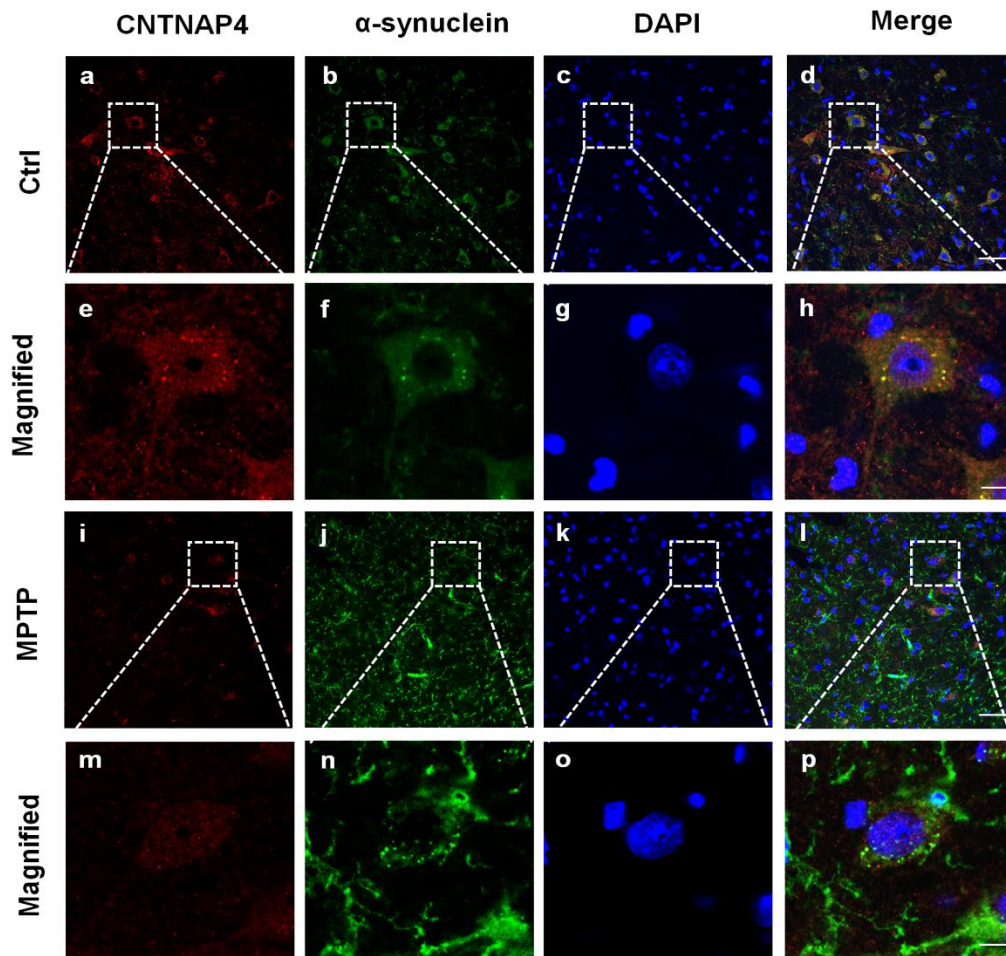

**Figure S1. CNTNAP4 expression is decreased in the chronic MPTP mouse model.** Immunofluorescent staining of CNTNAP4 and  $\alpha$ -synuclein in the SNpc of control and chronic MPTP mice. Boxes denote areas that are magnified in the columns labeled as “Magnified” (scale bars, 25  $\mu$ m in A–D and I–L; 5  $\mu$ m in E–H and M–P).

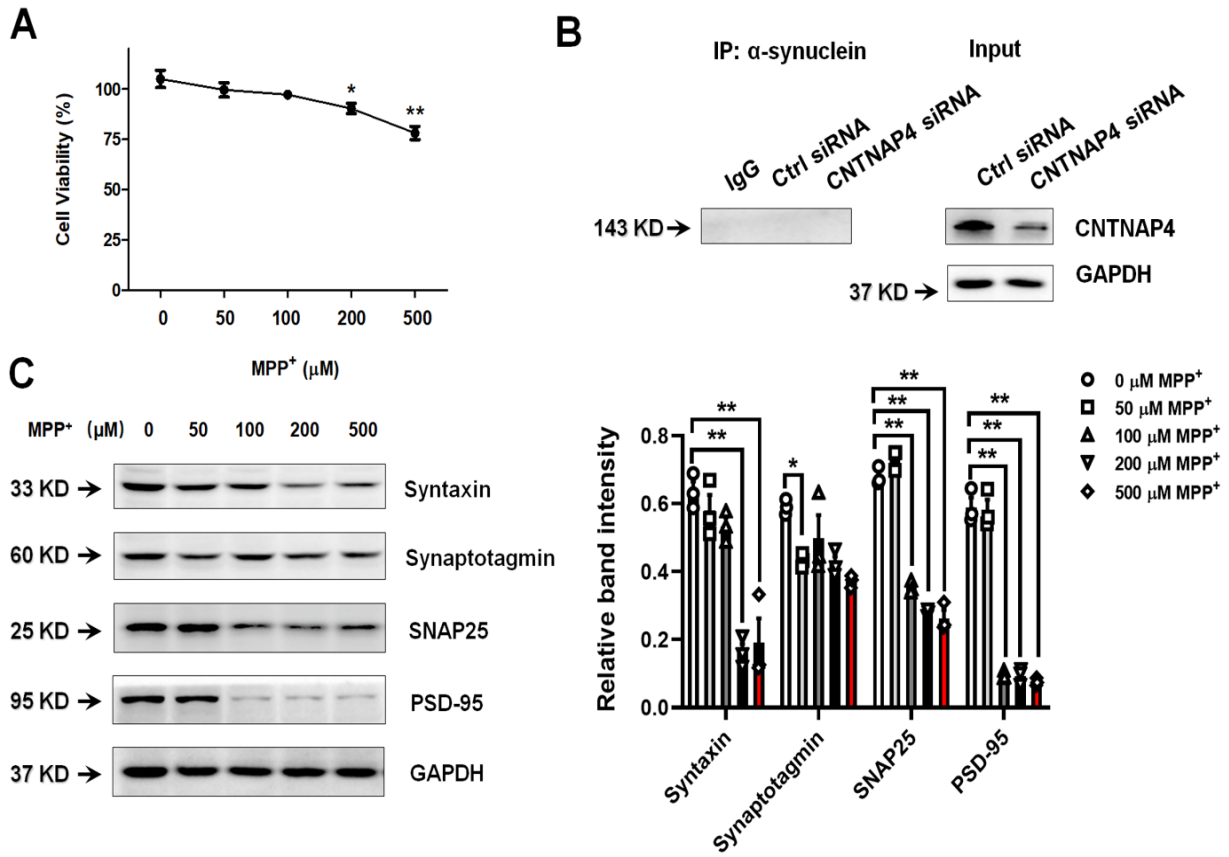

**Figure S2. Effect of MPP<sup>+</sup> on synaptic proteins in MN9D cells.** (A) Effects of different concentrations of MPP<sup>+</sup> on the viability of MN9D cells. (B) Immunoprecipitation did not detect an interaction between CNTNAP4 and α-synuclein in MN9D cells. (C) Effects of different concentrations of MPP<sup>+</sup> on expression levels of syntaxin, synaptotagmin, SNAP25, and PSD-95 were determined by Western blotting (n = 3 per group). \*\**p* < 0.01 vs. control group. Statistical significance was determined by one-way ANOVAs and Tukey tests for *post-hoc* comparisons.

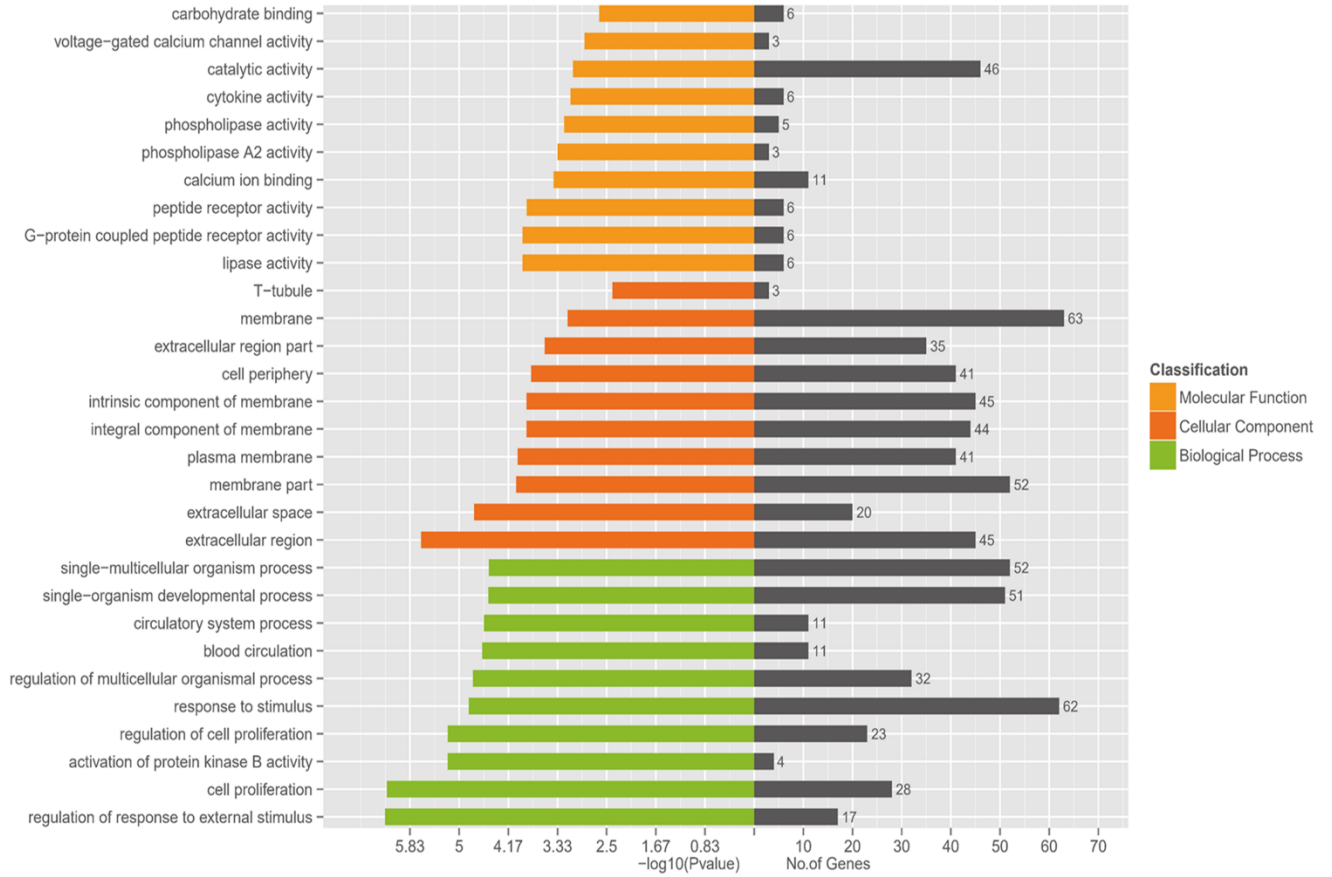

**Figure S3. GO analysis of DEGs following CNTNAP4 knockdown in MN9D cells.** After transfection with CNTNAP4 siRNA for 72 h, transcriptomic analysis was performed by RNA-seq. GO analysis was used to determine the functions of DEGs following CNTNAP4 knockdown in MN9D cells.

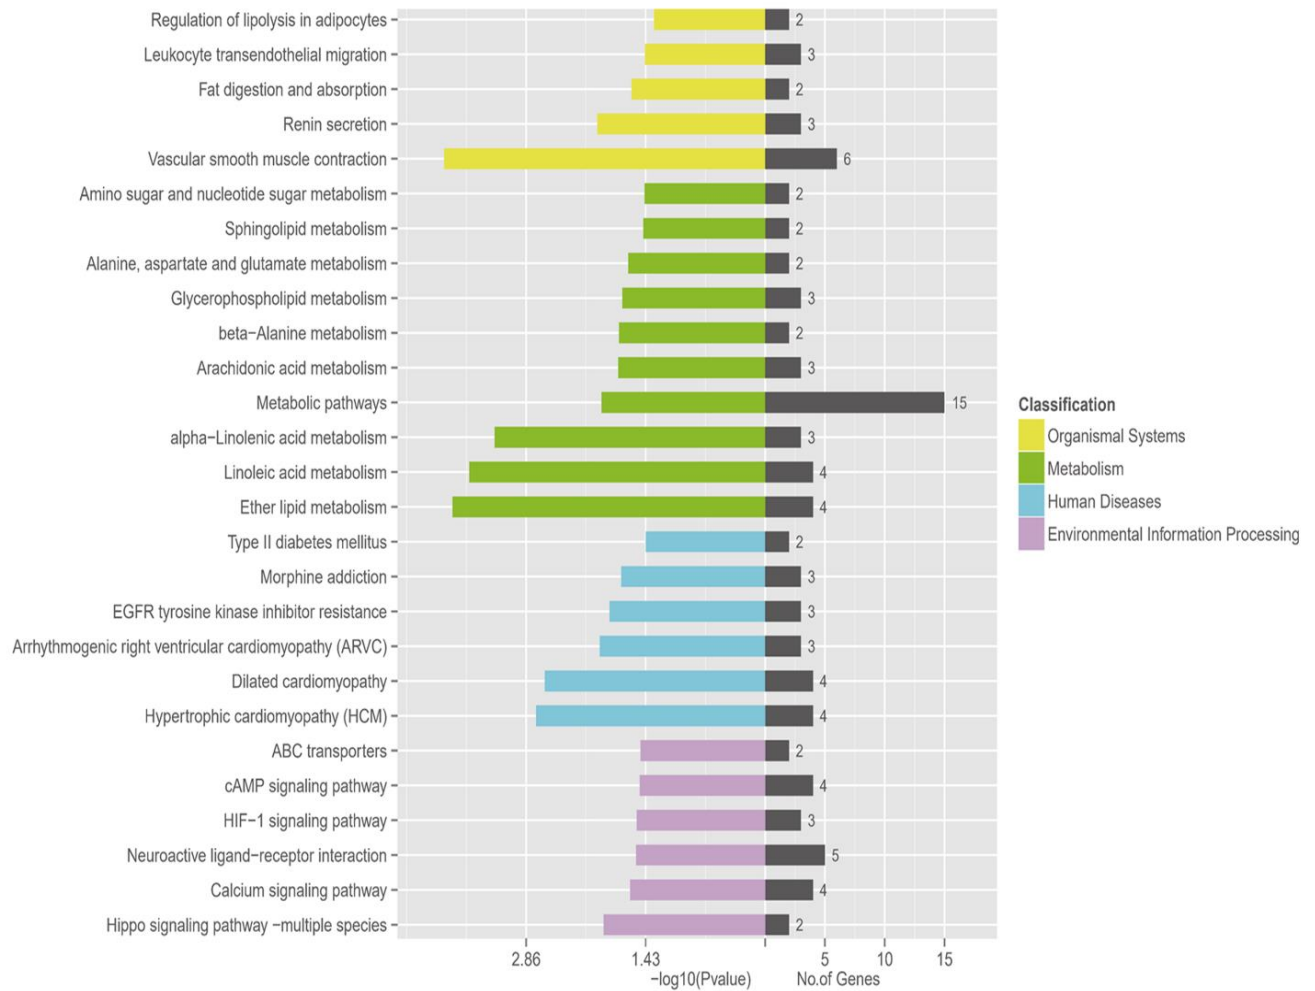

**Figure S4. KEGG analysis of DEGs following CNTNAP4 knockdown in MN9D cells.** After transfection with CNTNAP4 siRNA for 72 h, transcriptomic analysis was performed by RNA-seq. KEGG analysis was used to determine the functions of DEGs following CNTNAP4 knockdown in MN9D cells.

**A**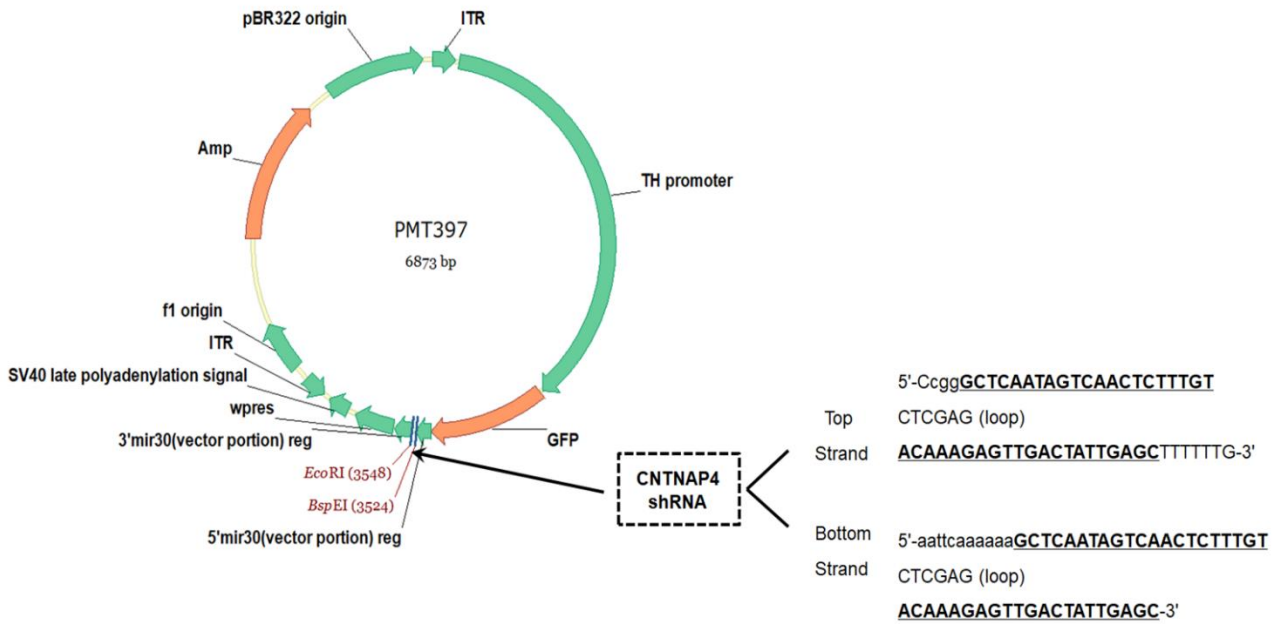**B**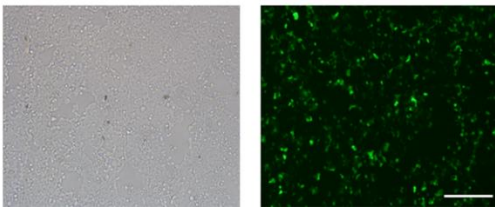

**Figure S5. Design of CNTNAP4 AAV-shRNA.** (A) AAV2/9-TH-3Flag-miR30-GFP-polyA (pMT397) shRNA was the interfering vector used in this study. The CNTNAP4 AAV-shRNA and Ctrl AAV-shRNA were generated by ligating annealed oligonucleotides encoding sh CNTNAP4 or a scramble sequence into the *Bsp* EI/*Eco* RI site of the AAV2/9-TH-3Flag-miR30-GFP-polyA (pMT397) shRNA vector. CNTNAP4 AAV-shRNA was constructed to express shRNA targeting CNTNAP4 (GCTCAATAGTCAACTCTTTGT) with the TH promoter. (B) The infection efficiencies of different titers of CNTNAP4 AAV-shRNA were examined in HEK-293T cells.

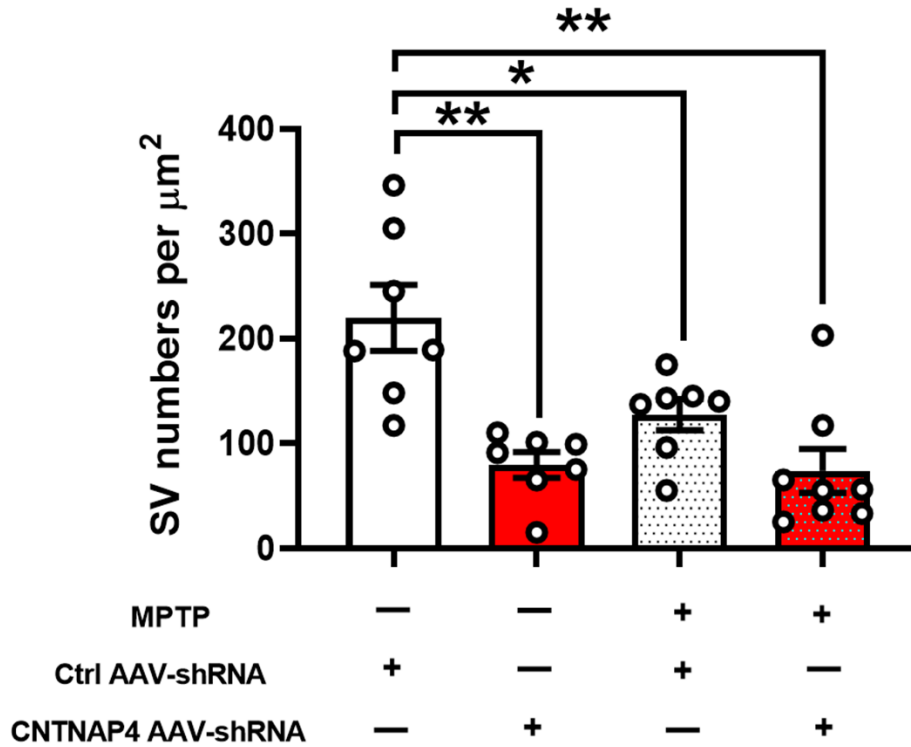

**Figure S6. CNTNAP4 knockdown in SNpc DA neurons reduces synaptic vesicles in the SNpc.**

Mice received Ctrl AAV-shRNA or CNTNAP4 AAV-shRNA in the SNpc, and then they were administrated saline or MPTP. The ultrastructure in the SNpc was examined by TEM, and quantification of synaptic vesicles is shown ( $n = 7$  in each of the control, CNTNAP4 AAV-shRNA, and MPTP group;  $n = 8$  in the MPTP+CNTNAP4 siRNA group). Results are expressed as the mean  $\pm$  SEM. \*\*  $p < 0.01$ , \*  $p < 0.05$  vs. Control group. In the figure, SV denotes synaptic vesicles. Statistical significance was determined by one-way ANOVAs and Tukey tests for *post-hoc* comparisons.
